# Supplementary material
Source: publisher figshare collection journal article supplement (https://acs.figshare.com/ndownloader/files/23629397)
Supplement: Supplementary file 1 [file 23629397]

# checkCIF/PLATON report

Structure factors have been supplied for datablock(s) I

THIS REPORT IS FOR GUIDANCE ONLY. IF USED AS PART OF A REVIEW PROCEDURE FOR PUBLICATION, IT SHOULD NOT REPLACE THE EXPERTISE OF AN EXPERIENCED CRYSTALLOGRAPHIC REFEREE.

No syntax errors found.      CIF dictionary      Interpreting this report

## Datablock: I

---

|                        |                                    |                                       |
|------------------------|------------------------------------|---------------------------------------|
| Bond precision:        | C-C = 0.0111 Å                     | Wavelength=0.71073                    |
| Cell:                  | a=47.9295(17)                      | b=47.9295(17)      c=13.1746(4)       |
|                        | alpha=90                           | beta=90      gamma=120                |
| Temperature:           | 296 K                              |                                       |
|                        | Calculated                         | Reported                              |
| Volume                 | 26210(2)                           | 26210(2)                              |
| Space group            | R -3 m                             | R -3 m                                |
| Hall group             | -R 3 2"                            | -R 3 2"                               |
| Moiety formula         | C29 H13 N O13 Tb Zn [+<br>solvent] | 0.17(C522 H234 N18 O234<br>Tb18 Zn18) |
| Sum formula            | C29 H13 N O13 Tb Zn [+<br>solvent] | C87 H39 N3 O39 Tb3 Zn3                |
| Mr                     | 807.72                             | 2423.03                               |
| Dx, g cm <sup>-3</sup> | 0.921                              | 0.921                                 |
| Z                      | 18                                 | 6                                     |
| Mu (mm <sup>-1</sup> ) | 1.651                              | 1.651                                 |
| F000                   | 7074.0                             | 7074.0                                |
| F000'                  | 7079.59                            |                                       |
| h,k,lmax               | 57,57,15                           | 57,57,15                              |
| Nref                   | 5407                               | 5374                                  |
| Tmin,Tmax              | 0.726,0.768                        | 0.680,0.746                           |
| Tmin'                  | 0.712                              |                                       |

Correction method= # Reported T Limits: Tmin=0.680 Tmax=0.746  
AbsCorr = MULTI-SCAN

Data completeness= 0.994      Theta(max)= 25.092

R(reflections)= 0.0711( 3593)      wR2(reflections)= 0.2441( 5374)

S = 1.064      Npar= 226

---

The following ALERTS were generated. Each ALERT has the format  
**test-name\_ALERT\_alert-type\_alert-level**.  
Click on the hyperlinks for more details of the test.

---

 **Alert level A**

PLAT973\_ALERT\_2\_A Check Calcd Positive Resid. Density on Zn1 2.93 eA-3

**Author Response: The large residual peak of 2.93 electrons per %A<sup>3</sup>, located 0.29 %A from the zinc atom, may be the result of residual absorption errors.**

---

 **Alert level B**

PLAT420\_ALERT\_2\_B D-H Without Acceptor O1W --H1WA . Please Check

**Author Response: Highly disordered solvent was located in this structure. Reflection contributions from this solvent were removed in the refinement. Thus no H bonding interactions were detected for O1W--H1WA and O1W--H1WB.**

PLAT420\_ALERT\_2\_B D-H Without Acceptor O1W --H1WB . Please Check

**Author Response: Highly disordered solvent was located in this structure. Reflection contributions from this solvent were removed in the refinement. Thus no H bonding interactions were detected for O1W--H1WA and O1W--H1WB.**

---

 **Alert level C**

RINTA01\_ALERT\_3\_C The value of Rint is greater than 0.12

Rint given 0.156

|                   |                                                  |         |        |
|-------------------|--------------------------------------------------|---------|--------|
| PLAT020_ALERT_3_C | The Value of Rint is Greater Than 0.12 .....     | 0.156   | Report |
| PLAT222_ALERT_3_C | NonSolvent Resd 1 H Uiso(max)/Uiso(min) Range    | 5.0     | Ratio  |
| PLAT241_ALERT_2_C | High 'MainMol' Ueq as Compared to Neighbors of   | 03      | Check  |
| PLAT241_ALERT_2_C | High 'MainMol' Ueq as Compared to Neighbors of   | 07      | Check  |
| PLAT242_ALERT_2_C | Low 'MainMol' Ueq as Compared to Neighbors of    | Tb1     | Check  |
| PLAT250_ALERT_2_C | Large U3/U1 Ratio for Average U(i,j) Tensor .... | 2.6     | Note   |
| PLAT342_ALERT_3_C | Low Bond Precision on C-C Bonds .....            | 0.01108 | Ang.   |
| PLAT369_ALERT_2_C | Long C(sp2)-C(sp2) Bond C6 - C8 .                | 1.53    | Ang.   |
| PLAT905_ALERT_3_C | Negative K value in the Analysis of Variance ... | -11.548 | Report |
| PLAT910_ALERT_3_C | Missing # of FCF Reflection(s) Below Theta(Min). | 6       | Note   |
| PLAT911_ALERT_3_C | Missing FCF Refl Between Thmin & STh/L= 0.597    | 28      | Report |
| PLAT977_ALERT_2_C | Check Negative Difference Density on H1WB        | -0.32   | eA-3   |

---

 **Alert level G**

FORMU01\_ALERT\_1\_G There is a discrepancy between the atom counts in the  
\_chemical\_formula\_sum and \_chemical\_formula\_moiety. This is  
usually due to the moiety formula being in the wrong format.

Atom count from \_chemical\_formula\_sum: C87 H39 N3 O39 Tb3 Zn3

Atom count from \_chemical\_formula\_moiety:C88.74 H39.78 N3.06 O39.78 Tb

PLAT002\_ALERT\_2\_G Number of Distance or Angle Restraints on AtSite 4 Note

|                   |                                                    |       |              |
|-------------------|----------------------------------------------------|-------|--------------|
| PLAT004_ALERT_5_G | Polymeric Structure Found with Maximum Dimension   | 3     | Info         |
| PLAT007_ALERT_5_G | Number of Unrefined Donor-H Atoms .....            | 2     | Report       |
| PLAT042_ALERT_1_G | Calc. and Reported MoietyFormula Strings Differ    |       | Please Check |
| PLAT045_ALERT_1_G | Calculated and Reported Z Differ by a Factor ...   | 3.00  | Check        |
| PLAT072_ALERT_2_G | SHELXL First Parameter in WGHT Unusually Large     | 0.16  | Report       |
| PLAT083_ALERT_2_G | SHELXL Second Parameter in WGHT Unusually Large    | 12.34 | Why ?        |
| PLAT172_ALERT_4_G | The CIF-Embedded .res File Contains DFIX Records   | 3     | Report       |
| PLAT300_ALERT_4_G | Atom Site Occupancy of O2 Constrained at           | 0.5   | Check        |
| PLAT300_ALERT_4_G | Atom Site Occupancy of C18 Constrained at          | 0.5   | Check        |
| PLAT300_ALERT_4_G | Atom Site Occupancy of C13 Constrained at          | 0.4   | Check        |
| PLAT300_ALERT_4_G | Atom Site Occupancy of C13B Constrained at         | 0.3   | Check        |
| PLAT300_ALERT_4_G | Atom Site Occupancy of C14 Constrained at          | 0.4   | Check        |
| PLAT300_ALERT_4_G | Atom Site Occupancy of C14B Constrained at         | 0.3   | Check        |
| PLAT300_ALERT_4_G | Atom Site Occupancy of C16 Constrained at          | 0.3   | Check        |
| PLAT300_ALERT_4_G | Atom Site Occupancy of C16B Constrained at         | 0.35  | Check        |
| PLAT300_ALERT_4_G | Atom Site Occupancy of C17 Constrained at          | 0.2   | Check        |
| PLAT300_ALERT_4_G | Atom Site Occupancy of C17B Constrained at         | 0.4   | Check        |
| PLAT300_ALERT_4_G | Atom Site Occupancy of H1WA Constrained at         | 0.5   | Check        |
| PLAT300_ALERT_4_G | Atom Site Occupancy of H1WB Constrained at         | 0.5   | Check        |
| PLAT300_ALERT_4_G | Atom Site Occupancy of H13 Constrained at          | 0.4   | Check        |
| PLAT300_ALERT_4_G | Atom Site Occupancy of H13B Constrained at         | 0.3   | Check        |
| PLAT300_ALERT_4_G | Atom Site Occupancy of H14 Constrained at          | 0.4   | Check        |
| PLAT300_ALERT_4_G | Atom Site Occupancy of H14B Constrained at         | 0.3   | Check        |
| PLAT300_ALERT_4_G | Atom Site Occupancy of H16 Constrained at          | 0.3   | Check        |
| PLAT300_ALERT_4_G | Atom Site Occupancy of H16B Constrained at         | 0.35  | Check        |
| PLAT301_ALERT_3_G | Main Residue Disorder .....(Resd 1 )               | 14%   | Note         |
| PLAT367_ALERT_2_G | Long? C(sp?)-C(sp?) Bond C15 - C19 .               | 1.54  | Ang.         |
| PLAT398_ALERT_2_G | Deviating C-O-C Angle From 120 for O1              | 77.7  | Degree       |
| PLAT606_ALERT_4_G | VERY LARGE Solvent Accessible VOID(S) in Structure | !     | Info         |
| PLAT720_ALERT_4_G | Number of Unusual/Non-Standard Labels .....        | 2     | Note         |
| PLAT773_ALERT_2_G | Check long C-C Bond in CIF: C16 --C17              | 1.72  | Ang.         |
| PLAT773_ALERT_2_G | Check long C-C Bond in CIF: C17B --C18             | 2.00  | Ang.         |
| PLAT779_ALERT_4_G | Suspect or Irrelevant (Bond) Angle(s) in CIF . #   | 40    | Check        |
|                   | C13 -C12 -C13B 1.555 1.555 1.555                   | 27.00 | Deg.         |
| PLAT779_ALERT_4_G | Suspect or Irrelevant (Bond) Angle(s) in CIF . #   | 43    | Check        |
|                   | C17 -C12 -C17B 1.555 1.555 1.555                   | 25.10 | Deg.         |
| PLAT779_ALERT_4_G | Suspect or Irrelevant (Bond) Angle(s) in CIF . #   | 51    | Check        |
|                   | C14 -C13 -C14B 1.555 1.555 1.555                   | 26.60 | Deg.         |
| PLAT779_ALERT_4_G | Suspect or Irrelevant (Bond) Angle(s) in CIF . #   | 58    | Check        |
|                   | C13 -C14 -C13B 1.555 1.555 1.555                   | 27.20 | Deg.         |
| PLAT779_ALERT_4_G | Suspect or Irrelevant (Bond) Angle(s) in CIF . #   | 69    | Check        |
|                   | C17B -C16 -C17 1.555 1.555 1.555                   | 19.50 | Deg.         |
| PLAT779_ALERT_4_G | Suspect or Irrelevant (Bond) Angle(s) in CIF . #   | 83    | Check        |
|                   | C17B -C17 -C16B 1.555 1.555 1.555                  | 36.40 | Deg.         |
| PLAT779_ALERT_4_G | Suspect or Irrelevant (Bond) Angle(s) in CIF . #   | 86    | Check        |
|                   | C16B -C17 -C16 1.555 1.555 1.555                   | 21.10 | Deg.         |
| PLAT779_ALERT_4_G | Suspect or Irrelevant (Bond) Angle(s) in CIF . #   | 98    | Check        |
|                   | C17 -C17B -C18 1.555 1.555 1.555                   | 27.60 | Deg.         |
| PLAT779_ALERT_4_G | Suspect or Irrelevant (Bond) Angle(s) in CIF . #   | 100   | Check        |
|                   | C16B -C17B -C16 1.555 1.555 1.555                  | 23.60 | Deg.         |
| PLAT779_ALERT_4_G | Suspect or Irrelevant (Bond) Angle(s) in CIF . #   | 107   | Check        |
|                   | C17B -C16B -C17 1.555 1.555 1.555                  | 17.70 | Deg.         |
| PLAT779_ALERT_4_G | Suspect or Irrelevant (Bond) Angle(s) in CIF . #   | 120   | Check        |
|                   | C14B -C13B -C14 1.555 1.555 1.555                  | 25.10 | Deg.         |
| PLAT779_ALERT_4_G | Suspect or Irrelevant (Bond) Angle(s) in CIF . #   | 127   | Check        |
|                   | C13B -C14B -C13 1.555 1.555 1.555                  | 28.73 | Deg.         |
| PLAT779_ALERT_4_G | Suspect or Irrelevant (Bond) Angle(s) in CIF . #   | 133   | Check        |
|                   | C14 -C15 -C14B 1.555 1.555 1.555                   | 27.90 | Deg.         |
| PLAT779_ALERT_4_G | Suspect or Irrelevant (Bond) Angle(s) in CIF . #   | 136   | Check        |
|                   | C16 -C15 -C16B 1.555 1.555 1.555                   | 22.90 | Deg.         |
| PLAT779_ALERT_4_G | Suspect or Irrelevant (Bond) Angle(s) in CIF . #   | 142   | Check        |
|                   | C17 -C18 -C17B 1.555 1.555 1.555                   | 10.60 | Deg.         |

|                   |                                                  |     |       |
|-------------------|--------------------------------------------------|-----|-------|
| PLAT789_ALERT_4_G | Atoms with Negative _atom_site_disorder_group #  | 7   | Check |
| PLAT804_ALERT_5_G | Number of ARU-Code Packing Problem(s) in PLATON  | 8   | Info  |
| PLAT860_ALERT_3_G | Number of Least-Squares Restraints .....         | 3   | Note  |
| PLAT868_ALERT_4_G | ALERTS Due to the Use of _smtbx_masks Suppressed | !   | Info  |
| PLAT909_ALERT_3_G | Percentage of I>2sig(I) Data at Theta(Max) Still | 36% | Note  |
| PLAT913_ALERT_3_G | Missing # of Very Strong Reflections in FCF .... | 1   | Note  |
| PLAT933_ALERT_2_G | Number of OMIT Records in Embedded .res File ... | 28  | Note  |
| PLAT978_ALERT_2_G | Number C-C Bonds with Positive Residual Density. | 7   | Info  |

---

1 **ALERT level A** = Most likely a serious problem - resolve or explain  
 2 **ALERT level B** = A potentially serious problem, consider carefully  
 13 **ALERT level C** = Check. Ensure it is not caused by an omission or oversight  
 57 **ALERT level G** = General information/check it is not something unexpected

3 ALERT type 1 CIF construction/syntax error, inconsistent or missing data  
 18 ALERT type 2 Indicator that the structure model may be wrong or deficient  
 11 ALERT type 3 Indicator that the structure quality may be low  
 38 ALERT type 4 Improvement, methodology, query or suggestion  
 3 ALERT type 5 Informative message, check

---

## checkCIF publication errors

---

### Alert level A

PUBL004\_ALERT\_1\_A The contact author's name and address are missing,  
     \_publ\_contact\_author\_name and \_publ\_contact\_author\_address.  
 PUBL005\_ALERT\_1\_A \_publ\_contact\_author\_email, \_publ\_contact\_author\_fax and  
     \_publ\_contact\_author\_phone are all missing.  
     At least one of these should be present.  
 PUBL006\_ALERT\_1\_A \_publ\_requested\_journal is missing  
     e.g. 'Acta Crystallographica Section C'  
 PUBL008\_ALERT\_1\_A \_publ\_section\_title is missing. Title of paper.  
 PUBL009\_ALERT\_1\_A \_publ\_author\_name is missing. List of author(s) name(s).  
 PUBL010\_ALERT\_1\_A \_publ\_author\_address is missing. Author(s) address(es).  
 PUBL012\_ALERT\_1\_A \_publ\_section\_abstract is missing.  
     Abstract of paper in English.

---

7 **ALERT level A** = Data missing that is essential or data in wrong format  
 0 **ALERT level G** = General alerts. Data that may be required is missing

---

## Publication of your CIF

You should attempt to resolve as many as possible of the alerts in all categories. Often the minor alerts point to easily fixed oversights, errors and omissions in your CIF or refinement strategy, so attention to these fine details can be worthwhile. In order to resolve some of the more serious problems it may be necessary to carry out additional measurements or structure refinements. However, the nature of your study may justify the reported deviations from journal submission requirements and the more serious of these should be commented upon in the discussion or experimental section of a paper or in the "special\_details" fields of the CIF. *checkCIF* was carefully designed to identify outliers and unusual parameters, but every test has its limitations and alerts that are not important in a particular case may appear. Conversely, the absence of alerts does not guarantee there are no aspects of the results needing attention. It is up to the individual to critically assess their own results and, if necessary, seek expert advice.

If level A alerts remain, which you believe to be justified deviations, and you intend to submit this CIF for publication in a journal, you should additionally insert an explanation in your CIF using the Validation Reply Form (VRF) below. This will allow your explanation to be considered as part of the review process.

## Validation response form

Please find below a validation response form (VRF) that can be filled in and pasted into your CIF.

```
# start Validation Reply Form
_vrf_PUBL004_GLOBAL
;
PROBLEM: The contact author's name and address are missing,
RESPONSE: ...
;
_vrf_PUBL005_GLOBAL
;
PROBLEM: _publ_contact_author_email, _publ_contact_author_fax and
RESPONSE: ...
;
_vrf_PUBL006_GLOBAL
;
PROBLEM: _publ_requested_journal is missing
RESPONSE: ...
;
_vrf_PUBL008_GLOBAL
;
PROBLEM: _publ_section_title is missing. Title of paper.
RESPONSE: ...
;
_vrf_PUBL009_GLOBAL
;
PROBLEM: _publ_author_name is missing. List of author(s) name(s).
RESPONSE: ...
;
_vrf_PUBL010_GLOBAL
;
PROBLEM: _publ_author_address is missing. Author(s) address(es).
RESPONSE: ...
;
_vrf_PUBL012_GLOBAL
;
```

PROBLEM: \_publ\_section\_abstract is missing.  
RESPONSE: ...  
;  
# end Validation Reply Form

If you wish to submit your CIF for publication in Acta Crystallographica Section C or E, you should upload your CIF via the web. If you wish to submit your CIF for publication in IUCrData you should upload your CIF via the web. If your CIF is to form part of a submission to another IUCr journal, you will be asked, either during electronic submission or by the Co-editor handling your paper, to upload your CIF via our web site.

**PLATON version of 04/06/2020; check.def file version of 02/06/2020**

Datablock I - ellipsoid plot
